# Supplementary material for: Role of conical intersection seam topography in the chemiexcitation of 1,2-dioxetanes
Source: Royal Society of Chemistry journal article supplement (doi:10.1039/d1cp05028a), 2022-01-01
Supplement: d1cp05028a1.pdf [file d1cp05028a1.pdf]

## Supplementary Information: Role of conical intersection seam topography in the chemiexcitation of 1,2-dioxetanes

Ignacio Fdez. Galván, Anders Brakestad, and Morgane Vacher

Figures S-1 to S-3 are a complement to Figures 8, 11, and 14. They show, for each of the reference trajectories, the magnitude of the transition dipole moment between the ground state and the excited states. Given that the ground seems to be well separated from the excited states in all three trajectories, this offers another view at the wave function changes that occur along the trajectories.

In fig. S-1 the most significant features are exchanges between  $S_1$  and  $S_2$  at  $\sim 50^\circ$ ,  $\sim 63^\circ$ , and  $\sim 70^\circ$ , confirming the crossings observed in fig. 8.

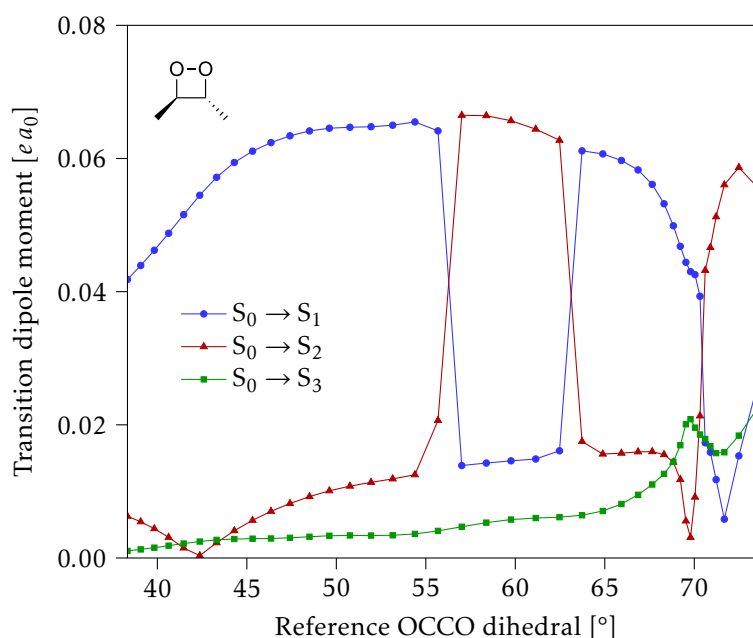

Figure S-1: Transition dipoles for the reference trajectory of 2Me.

In fig. S-2 there is an evident crossing between  $S_1$  and  $S_2$  at  $\sim 90^\circ$ , but it is not clear that the lines crossing at  $\sim 75^\circ$  corresponds to a crossing between the states, as the changes are rather gradual. Comparing with fig. 11, it seems clear some interaction occurs between these states in the range  $70^\circ$  to  $75^\circ$ .

In fig. S-3 a clear crossing between  $S_1$  and  $S_2$  can be observed at  $\sim 90^\circ$  too. The energy crossings between  $S_2$  and  $S_3$  that are seen in fig. 11 at  $\sim 50^\circ$  and  $\sim 70^\circ$  are not as obvious, but an interaction between these states can also be deduced.

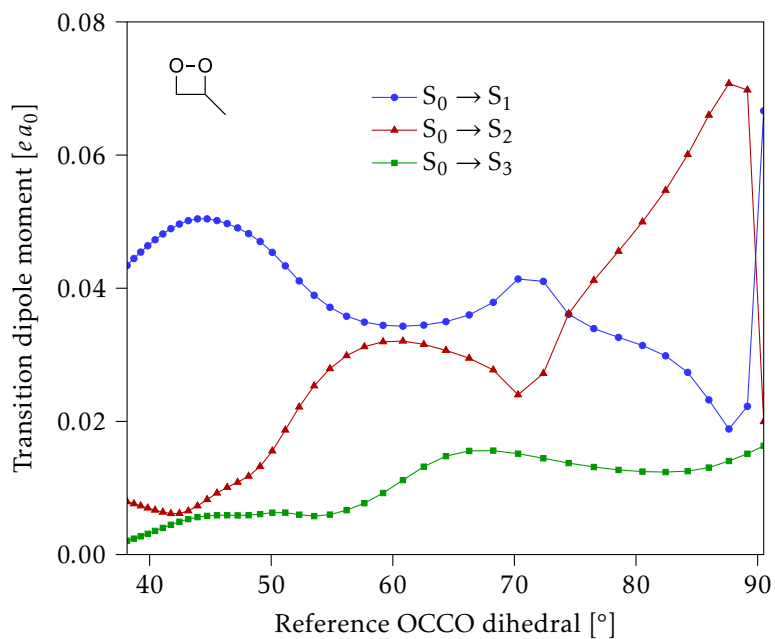

Figure S-2: Transition dipoles for the reference trajectory of 1Me.

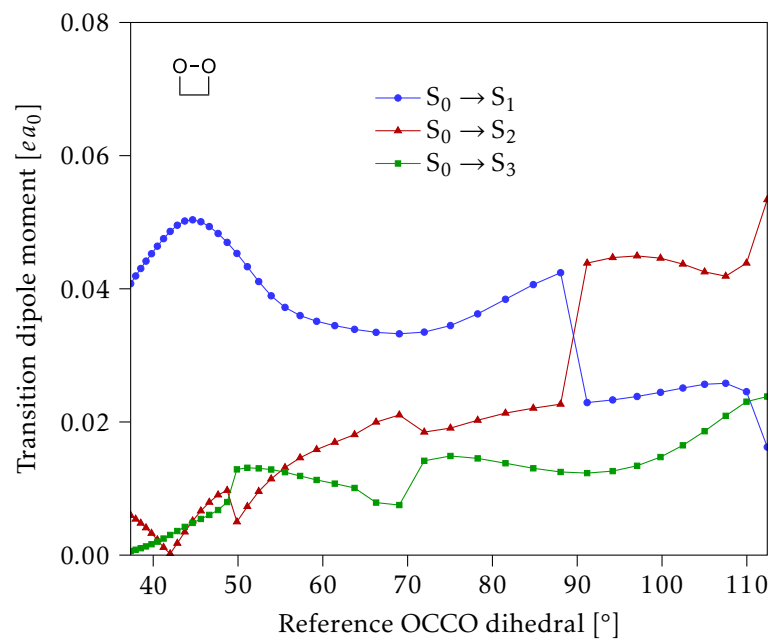

Figure S-3: Transition dipoles for the reference trajectory of 0Me.
